# Supplementary material for: Acylation and carbanilation of cellulose in ionic liquids
Source: Royal Society of Chemistry journal article supplement (doi:10.1039/b513157j), 2005-12-22
Supplement: b513157j.pdf [file b513157j.pdf]

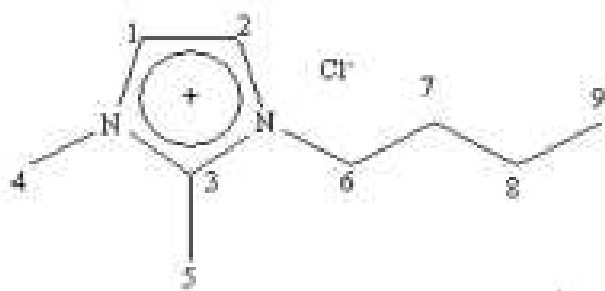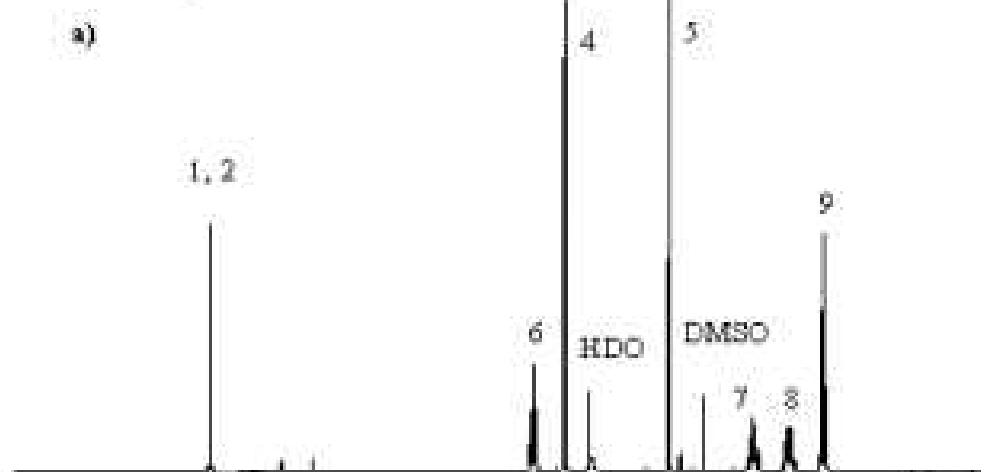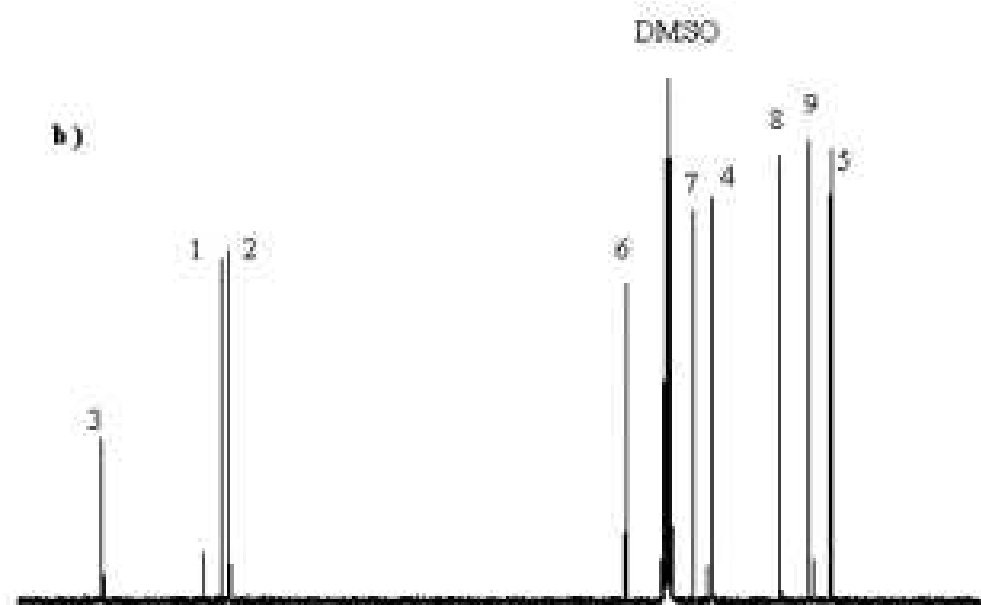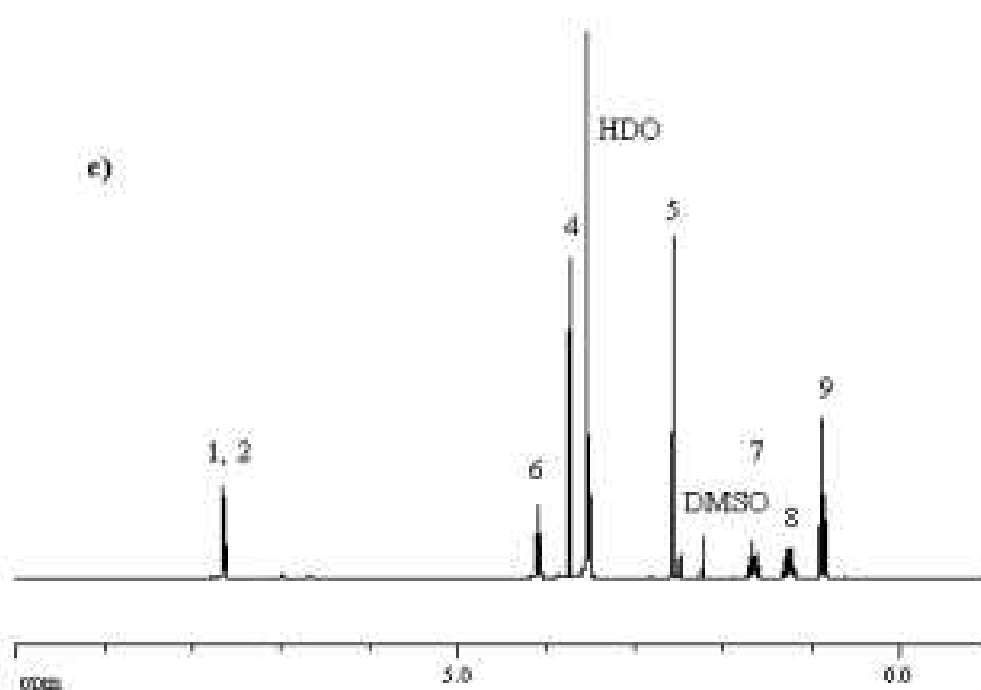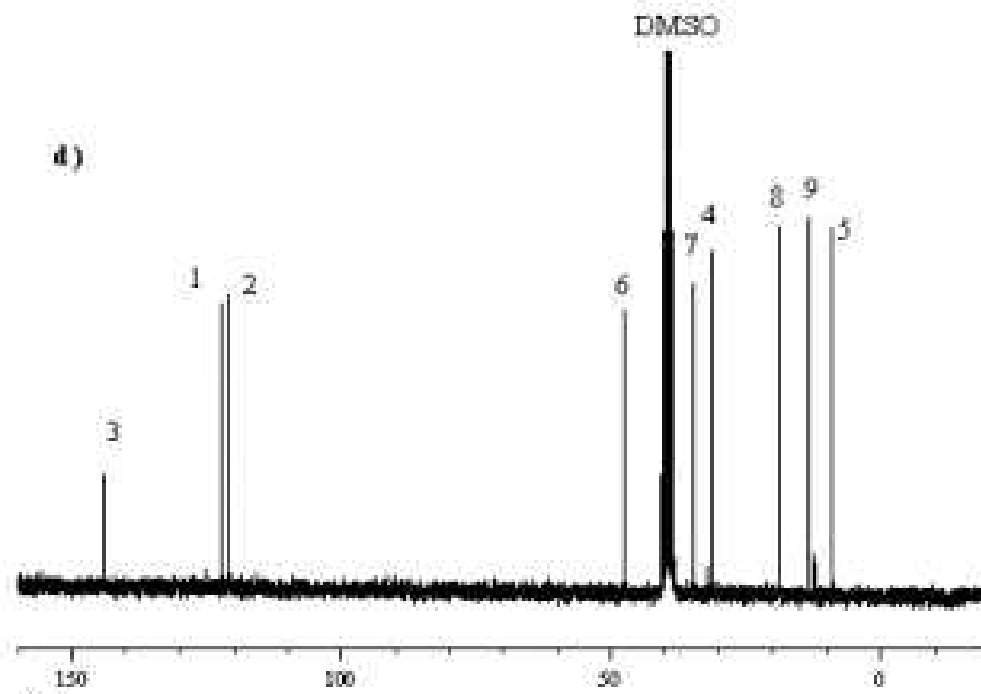

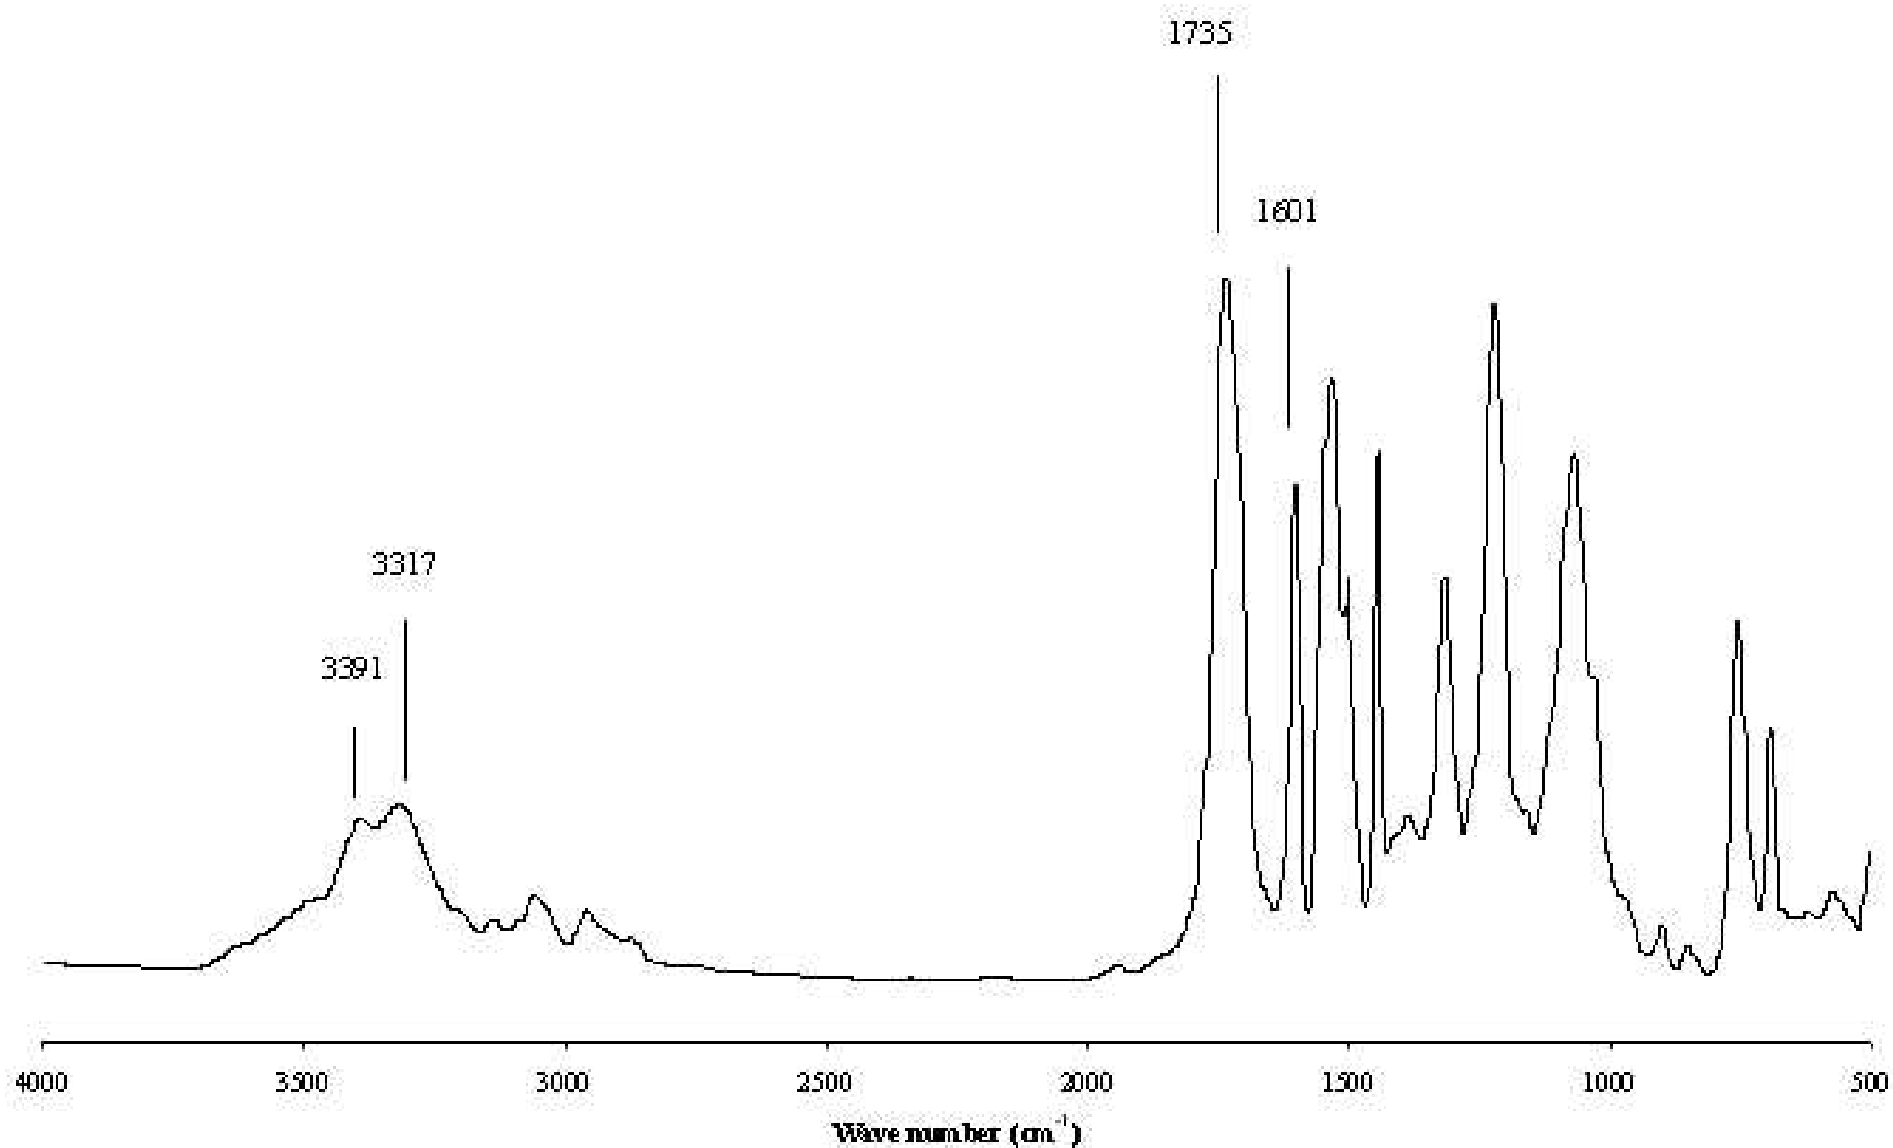

Figure 2. IR spectra of a complete substituted cellulose carbanilate (A5). The assay was determined in 200 mg KBr.

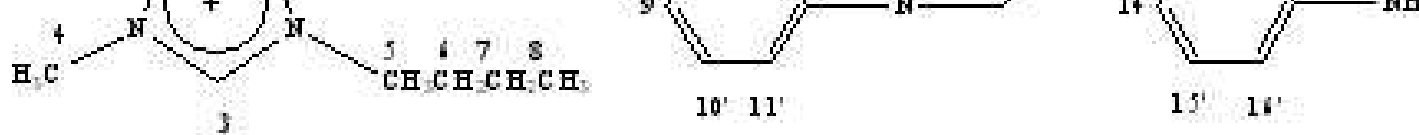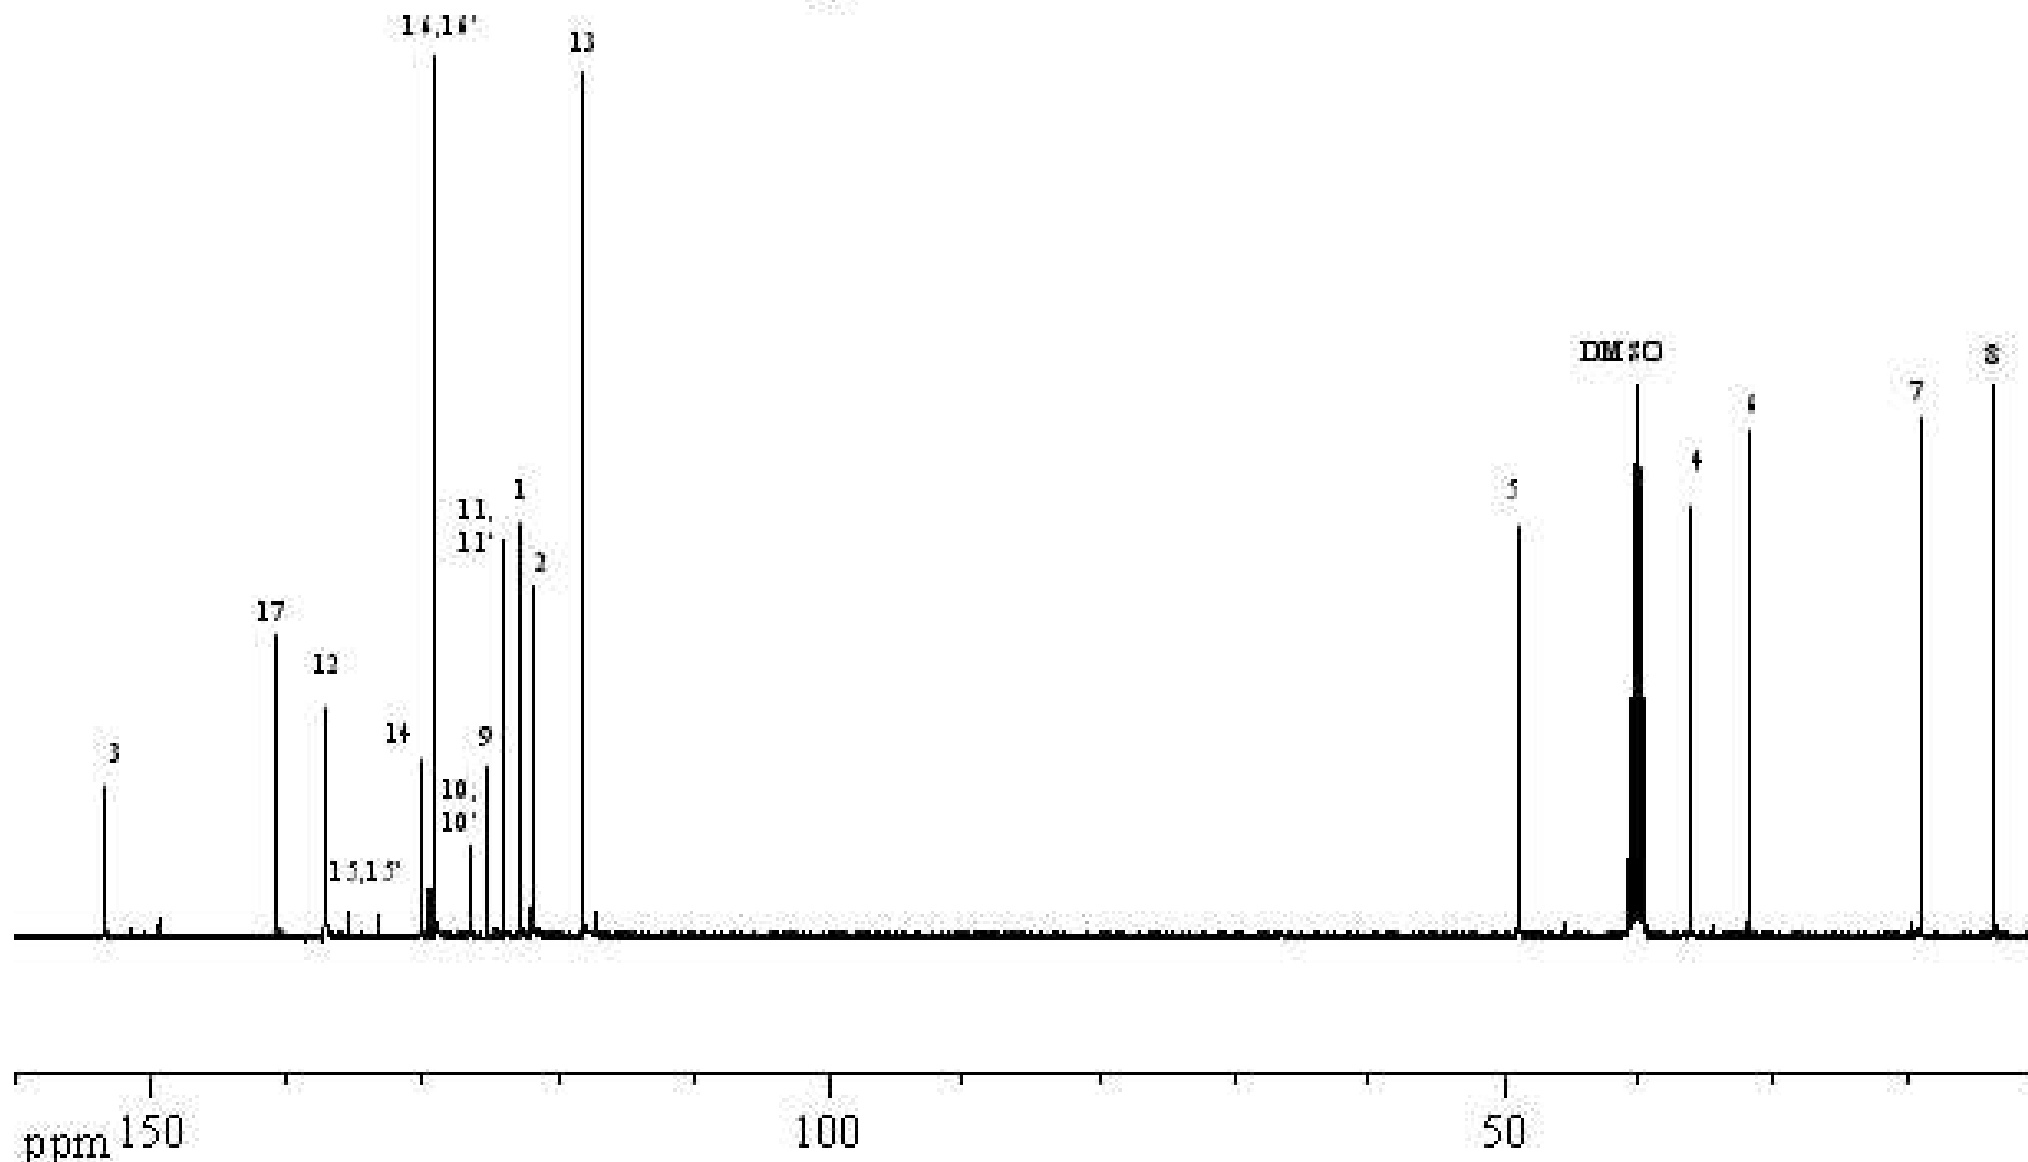

Figure 4.  $^{13}\text{C}$  NMR spectrum of a mixture of  $[\text{C}_4\text{mim}]^+\text{Cl}^-$  and phenyl isocyanate stirred 2 h at  $80^\circ\text{C}$ . The spectrum was measured in  $\text{DMSO-d}_6$ .
